# Supplementary material for: Molecular Characterization and Expression Analysis of NLRC3-like, ASC, and Caspase1 in Spotted Sea Bass (Lateolabrax maculatus)
Source: MDPI journal article supplement (doi:10.3390/fishes8070378), 2023-07-21
Supplement: s1 [file s1]

1 aagttagtttcacttttctctgaatgttgttgcgacgcttggtttcctccatctgaacctccagctgaaggtgaaag  
76 tgtgtgagctgatgtggatgtgagttcagcagc**ATGG**ATCAGTGTGAGGACAGAGAGGAGGGAGTCCGTCCTCT  
1 M D Q C E D R E E G V R P S  
151 AAAACCTCTCTCAAAGCTCAGAGCCCAGAGAAGCAGCAGGGACCAGACTCTGCTGGACCTGGACCTGAACCTGGA  
15 K T S L K A Q S P E K Q Q G P D S A G P G P E P G  
226 GCTGGACCTGGAGCTGGAGCTGAACCTGGACCTGGACCTGGAGCTGAACCTGGACCTGGACCCAGCTGTGTGTCC  
40 A G P G A G A E P G P G P G A E P G P G P S C V S  
301 TTCAAGAGCGACCGGTCAAATGATCGACTCATTGAATTTAAAGGAGAACAACCGTCTGCTCCACAGAGAGTCCGAC  
65 F K S D R S N D R L I E F K G E Q P S A P Q R V D  
376 CAGCAGAGCTCAGAGGTCCCAGTGGTCAGTCAGCCCAGCAGCATCAAACACACCTGGACTCCATATTTATGCTG  
90 Q Q S S E V P S G Q S A Q Q H Q T H L D S I F M L  
451 CTGGAGGAGAACATTGTCACTTTTGTGAAGAACGAGCTGAAGAAGTTCAAGAAGGATCTGAGCTCAGGTTACCCA  
115 L E E N I V T F V K N E L K K F K K D L S S G Y P  
526 GAATGCTTAGAGAGTCAGAGGGAGGATGAGGAGGTGTTGGACGGTGAGGATGAAGAGCAGAGGAGGAGCAGCAGA  
140 E C L E S Q R E D E E V L D G E D E E Q R R S S R  
601 GAGGCCTTTCTGAAGATCACACAGAACTTCCTGAGGAGAATGAAGCAGGAGGAGCTGGCTGACCGTCTGCAGAGC  
165 E A F L K I T Q N F L R R M K Q E E L A D R L Q S  
676 AAACCTTGATCCAGTTTGTTCAGCGTAAACTTAAATCTAACCTGAAGAAGAAGTTTCAGTGTGTGTTTGAGGGC  
190 K L D P V C F Q R K L K S N L K K K F Q C V F E G  
751 ATCACTAAAGCAGGAAACCCAACCTTCTGAATCAGATCTACACAGAGCTCTACATCACAGAGGGAGGGACTGCA  
215 I T K A G N P T L L N Q I Y T E L Y I T E G G T A  
826 GGGGTCAATGATGAACATGAGGTGAGACAGATCGAAACAGCATCCAGGAAACCAGACAGACCAGAAACAACAATC  
240 G V N D E H E V R Q I E T A S R K P D R P E T T I  
901 AGACAAGAAGACATCTTTAAAGCCTCAACTGGAAGAGATGAACCAATCAGAACAGTGTGACAAAGGGAGTGGCT  
265 R Q E D I F K A S T G R D E P I R T V M T K G V A  
976 GGCATTGGGAAAACAGTCTTAACACAGAAGTTCACTCTGGACTGGGCTGAAGACAAAGCCAACAGGACATACAG  
290 G I G K T V L T Q K F T L D W A E D K A N Q D I Q  
1051 TTCACATTTCATTCACTTTCAGAGAGCTGAATGTGCTGAAAGAGAGAAAGTTCACTTGGTGGAACTTGTTCAT  
315 F T F P F T F R E L N V L K E R K F S L V E L V H  
1126 CACTTCTTTACTGAAACCAAAGAAGCAGGAATCTGCAGGTTTGAAGAGTTCAGGTTGTGTTTCATCTTTGACGGT  
340 H F F T E T K E A G I C R F E E F Q V V F I F D G  
1201 CTGGATGAGTGTGACTTCCTCTGGACTTCACAACAATCAGATCCTGACTGATGTTACAGAGTCCACCTCAGTG  
365 L D E C R L P L D F H N N Q I L T D V T E S T S V  
1276 GATGTGCTGCTGACAAACCTCATCAGGGGAAACTGCTTCCCTCTGCTCGTCTCTGGATAACCACACGACCTGCA  
390 D V L L T N L I R G K L L P S A R L W I T T R P A  
1351 GCAGCCAATCAGATCCCTCCTGAGTGTGTTGACATGGTGACAGAGGTGAGAGGGTTCACTGACCCACAGAAGGAG  
415 A A N Q I P P E C V D M V T E V R G F T D P Q K E  
1426 GAGTACTTCTGGAAGAGATTGAGAGATAAAAGAAGGCCAGAAGAATCATCTCCCACATCAAGACATCACGAAGC  
440 E Y F W K R F R D K K K A R R I I S H I K T S R S  
1501 CTCCACATCATGTGCCATCCCAGTCTTCTGCTGGATCACTGCTACAGTTCTGGAGGATGTGTTGAAAACCAGA  
465 L H I M C H I P V F C W I T A T V L E D V L K T R  
1576 GAGGGAGGAGAGCTGCCAAGACCTGACTGAGATGTACATCCACTTCCTGGTGGTTCAGTCCAACTGAAGAAC  
490 E G G E L P K T L T E M Y I H F L V V Q S K L K N  
1651 ATCAAGTATGATGGAGGAGCTGAGACAGATCCCACTGGAGTCCAGAGAGCAGGAAGATGATTGAGTCTCTGGGA  
515 I K Y D G G A E T D P H W S P E S R K M I E S L G  
1726 AAACCTGGCTTTTGATCAGCTGCAGAAAGAAACCTGATCTTCTATGAATCAGACCTGACAGAGTGTGGCATCGAT  
540 K L A F D Q L Q K G N L I F Y E S D L T E C G I D  
1801 ATCAGAGCAGCCTCAGTGTACTCAGGAGTGTTCACACAGATCTTTATAGAGGAGAGAGGACTGTACCAGGACAAG  
565 I R A A S V Y S G V F T Q I F I E E R G L Y Q D K  
1876 GTGTTCTGCTTCGTCCATCTGAGTGTTCAGGAGTTTCTGGCTGCTCTTCATGTTTCATCTGACATTATCAACTCT  
590 V F C F V H L S V Q E F L A A L H V H L T F I N S  
1951 GGAGTCAATCTGTTGTCAGAAGAACAATCAACCTCCCAGAAGTCTGAAACAAGAAAAGAATCTGCAGAGACA  
615 G V N L L S E E Q S T S Q K S E T R K E E S A E T  
2026 CACTTCTACCAGAGTGTGTGGACAAGGCCTTACAGAGTCCAAATGGACACCTGGACTGTTCTCCGCTTCTCT

640 H F Y Q S A V D K A L Q S P N G H L D L F L R F L  
 2101 CTGGGTCTTTCTCTGCAGACCAATCAGACTCTCCTACGAGGCCTGCTGACACAGACAGGAAGTAGCTCACAGACC  
 665 L G L S L Q T N Q T L L R G L L T Q T G S S S Q T  
 2176 AATCAGGAAAAGTCCAGTACATCAAGAAGAAGATTGAAGAGACTCCCTCTGCAGAGAAAAGCATCAATCTGTTCT  
 690 N Q E T V Q Y I K K K I E E T P S A E K S I N L F  
 2251 CACTGTCTGAATGAATGAATGATTGTTCTCTAGTGGATCAGATCCAACAGTACCTGAGTTCAGGAAGTCTCTCC  
 715 H C L N E L N D C S L V D Q I Q Q Y L S S G S L S  
 2326 ACAGATAAACTGTCTCCTGCTCAGTGGTCAGCTCTGGTCTTCATCTTACTGTCATCAGAAAAAGATCTGGACGTG  
 740 T D K L S P A Q W S A L V F I L L S S E K D L D V  
 2401 TTTGACCTGAAGAAATACTCTGCTTCAGAGGAGGCTCTTCTGAGGCTGCTGCCAGTGGTTGAAGTCTCCAACAAA  
 765 F D L K K Y S A S E E A L L R L L P V V E V S N K  
 2476 GCTCTACTGAGTGGCTGTAACCTCTCCGACAGAAGTCTTGAAGCTCTGTCTCAGTTCAGCTCCCAGTCTCTCT  
 790 A L L S G C N L S D R S L E A L S S V L S S Q S S  
 2551 AGTCTGAGAGAGCTGGACCTGAGTAACAACAACCTGCAGGATTGAGGAGTGAAGCTGTGTCTGCTGGGGTGGAG  
 815 S L R E L D L S N N N L Q D S G V K L L S A G V E  
 2626 AGTCCACACTGTACACTGGAACTCTCAGGCTGTCAGGCTGTCTGATCACAGAGGAAGGCTGTGCTTCTCTGGCC  
 840 S P H C T L E T L R L S G C L I T E E G C A S L A  
 2701 TCAGCTCTGAGCTCCAACCCCTCTCATCTGAGAGAGCTGGACCTGAGCTACAATCATCCAGGAGATTGAGGAGTG  
 865 S A L S S N P S H L R E L D L S Y N H P G D S G V  
 2776 AAGCTGCTGTCTGCTGGACACTGGAGACTGGACACTCTCAGGGTGGAGCCTGGTGGAGTCCGATGGTTGACACCA  
 890 K L L S A G H W R L D T L R V E P G G V R W L T P  
 2851 GGTCTGAGGAAGTATTCTGTGAATCACAATCGACACAAACACAGTCAACAGAGAGATCAAAGTGTCTGACAAC  
 915 G L R K Y S C E L T I D T N T V N R E I K L S D N  
 2926 AACAGGAAGGTGACACATGTGGAGGAGGTTGAGTCATATCCTGATCATCCAGACAGGTTTGACCCCTATCCTCAG  
 940 N R K V T H V E E V Q S Y P D H P D R F D P Y P Q  
 3001 CTGCTGTGTAGAAATGTTCTGACTGGTCGCTGTTACTGGGAGGTCGAGTGGAGAGGAAGAGTTTCTATATCAGTG  
 965 L L C R N V L T G R C Y W E V E W R G R V S I S V  
 3076 AGTTACAGAGGAATCAGCAGGAGAGGAAACAGGAAGACTGTGTGTTTGGATGGAATGATCAGTCCCTGGAGACTG  
 990 S Y R G I S R R G N R E D C V F G W N D Q S W R L  
 3151 AGCTGCTCTGATGATGGTCGTTACTTTGTCAGGCACAATAAGAGAGAAACACCTATCTCCTCCTCCTCCTCCTC  
 1015 S C S D D G R Y F V R H N K R E T P I S S S S S F  
 3226 TCCTCCTCCTCCTCCTCCTCCTCCTCCTCCTCCTCCTCCTCCTCCTCCTCCTCCTCCTCCTCCTCCTCCTCCTC  
 1040 S S S S S S S S S S S N R V A V F V D C P A G T L S  
 3301 TTCTACAGAGTCTCCTCTGACACACTGACCCACCTCCACACCTTCAGCACCACATTCACTGAACCTCTTTATCCT  
 1065 F Y R V S S D T L T H L H T F S T T F T E P L Y P  
 3376 GGGTTTGGGTTGAGGTCCTGGTCCAGTCTTGGTTCCTCAGTGTCTCTGTGTTCTCTGT**TAG**gacggagagtctctct  
 1090 G F G F R S W S S L G S S V S L C S L \*  
 3451 cctgttggagaaacattttcactgatgaacagatcagttgagtctgtacaggatcacagttacagaaatctttca  
 3526 tgttattaatcaatcaacagttatcaatgaacttcgtaccaaattcattcagagtgattgaaaagattcttcat  
 3601 acattgtaaacttgttcctcttctcttttaagatggaagctgtgatcattaaatagtggcaaagctgttgacttg  
 3676 gaccttctgtcctgttgtgtttgaattctggctcttgttca**aaataaaa**gcataatgtaaaaaaaaaaaaaaaaaaaa  
 3751 aaaaa

**Supplement Figure S1. cDNA and deduced amino acid sequence of *Lm*NLRC3L.** The ORF is shown in upper case and the 5'-UTR and 3'-UTR sequences are in lower case. The translation initiation codon, stop codon and polyadenylation signal are shown in bold.

```

1      ttcgaaaaccaactcttttgacaagcaggacggcggtttgggatctcctggtgagagATGACTTCCAAAACCAT
1
1      M T S K T I
76     AAAAAGGCCTTGGCGGACACACTGGAGGACTTGTCAAAGAAGACTTTGCCAAGTTCCGCCACGCGTGCTGGAC
7      K K A L A D T L E D L S K E D F A K F R H A L L D
151    CGCAGAGAAGAGCCGCGGGTCAGACGCAACAGGGTGGAGGGCAAAACTATCTAGACATCACAGACGTGCTGGTG
32     R R E E P R V R R N R V E G K N Y L D I T D V L V
226    TCCGCCTTCACCGAGGCCGGAGCTCTCGACGTGGCCGCGGGCTTACTGAGACAGATCGGCTGCAGCCAGGAGGCA
57     S A F T E A G A L D V A A G L L R Q I G C S Q E A
301    GACCGCCTGGATGAGGAGTGCACAATCATTAAAGGTGGACAATCATCAAAACCTGGCTCTAGTGACACTGCAAGC
82     D R L D E E C T I I K G G Q S S K P G S S D T A S
376    CCCTCAGCCGGAGCATCTGGTAACACTAAGTGCACAGGTGCAGACTTTGTGGATAAACATCGAGTCGAGCTGATC
107    P S A G A S G N T K C T G A D F V D K H R V E L I
451    AATAGAGTGAGCAACATTGCACCCATCTTGGATGAGCTCCTCGAAAGAAAAGTCATCTCACAAGAGACGTATGAT
132    N R V S N I A P I L D E L L E R K V I S Q E T Y D
526    AACATCAGGTCTCTGCGTACTTCTCAGGAGAAGATGAGGGAGATCTACTCTAGTGGCCTCAAAGCTGGTCGATGT
157    N I R S L R T S Q E K M R E I Y S S G L K A G R C
601    TGCAAAGACATCTTCTGGGAAATCCTTCAGAAAAATGAGCAATTTCTCATTGCTGACCTCAAAGGAGAGCAGTAA
182    C K D I F W E I L Q K N E Q F L I A D L K G E Q *
676    atgtcgtggtgaaatctattcttagaccaaactacagtctacctgaacaaaaatgttttttattcccttacaa
751    tggggaaatactatttgtaatgatatgtctctgtggtggttctctcaaaaaaaaaaaaaaaaaaaaaaaaaaaaaa

```

**Supplement Figure S2. cDNA and deduced amino acid sequence of *LmASC*.** The ORF is shown in upper case and the 5'-UTR and 3'-UTR sequences are in lower case. The translation initiation codon, stop codon and polyadenylation signal are shown in bold.

1 ctctccggtgtaaagaccggttcctcctggttgaaagttgcacgccatcggtgcattttgatgcggaagaagagt  
76 caatccacacacaatctggacaaaagatgcacagcaaactgcaacactttggagcaaggggatcacgttttaagc  
151 cacacctgcatcagcccgagcagtaataaagcctttgctctgaccagtgatcatttaaagtaggtcacctgagg  
226 taaagcaggaaacatcgttgtcgtctcgtccctgcacgcagcacacagggagtgtccgtgacttcagttcagaca  
301 gatctgtgatgagaggtgcgaggc**ATGGCAGATAAGGAGCTTGCCAGGGTGAGGACTAAGTTTGTGAAAAAGGTG**  
1 M A D K E L A R V R T K F V E K V  
376 TCCAAAGAACTTATCAATCAGCTCCTGGACGACATTTTAGAAGATGGTGTCTGAATGATGGGGAGAAAGACTCA  
18 S K E L I N Q L L D D I L E D G V L N D G E K D S  
451 ATACTTGAGGAGAACAAGAGCACAACAGACAAGGCACGACGTCTCATTGACATAGTGAAGAGGAAAGGAAACGTT  
43 I L E E N K S T T D K A R R L I D I V K R K G N V  
526 GCCAGCAGGAAGATGATCGCTCACCTCCAGAGCAGAGATGCAACACTTTACGCTGAACGGGTCTGTCTGTGGG  
68 A S R K M I A H L Q S R D A T L Y A E L G L S C G  
601 CAACCTGCTCAGCCAGCTGCAGCGCCCCAGATGGAGAAGGAATGGTCAGCCACACTCAAGTCTTCCACCAACGCA  
93 Q P A Q P A A A P Q M E K E W S A T L K S S T N A  
676 TTCTGGATGGAGAACTGAATGATCCAAGTATTTACCCTGTGACCAAAGAGTCCATTGGGAATCGTGTGGCCCTG  
118 F W M E K L N D P S I Y P V T K E S I G N R V A L  
751 CTAATCACTAATATAACGTTTACTAATGAGAGATTCAATAGGAATGGAGCAAAGAAAGATGAGGACAACATGGAT  
143 L I T N I T F T N E R F N R N G A K K D E D N M D  
826 GAACTGCTCAAAGGGCTGGGATACGAGGTGGTGAATACTCAAACCTCACAGGAAAGGAGATCGATGAGGCTGTA  
168 E L L K G L G Y E V V K Y S N L T G K E I D E A V  
901 ATTAAGTTCTCTAAACATCCAAAACATAAAGAGACAGACAGTGTGATGGTGGTCATCATGTCTCATGGGAACTG  
193 I K F S K H P K L K E T D S V M V V I M S H G K L  
976 GGAGCTGTCTTGGTGTCAACTGGACAAATGAGACATCTGGTCGAGATGAGTTTCCATTGACAACATTTACAAA  
218 G A V L G V N W T N E T S G R D E F P I D N I Y K  
1051 CACTTGGGTTTCAGAGAAATGTCCAGCACTGCTGAACAAACCCAAGATCATCATCCAGGCCTGCAGAGGAGAG  
243 H L G S E K C P A L L N K P K I I I I Q A C R G E  
1126 GAGCAAGGATCAGTAATTGTTACTGACTGTGCTAACCCAGCTCTGTTCTCTGATGATGTGAACCAGCCCGTCCA  
268 E Q G S V I V T D C A N P A L F S D D V N Q P G P  
1201 TCATTGTCTGCTGATGAAGAAAACATAGAGGATGATAGGTTGAGATGTGTACACAAAGAAATACACTTCATTCT  
293 S L S A D E E N I E D D R L R C V H K E I H F I S  
1276 CTTCTTTCCTCCACCCCTGACACCGTCTCATATAGACACAGGAATGATGGGTCTTTTCTTATCCAGTACATTGTT  
318 L L S S T P D T V S Y R H R N D G S F L I Q Y I V  
1351 GAAGTATTCAACACCTTCTCACAGAAGGATGACATTGACGAACCTTTTAGAAAAGTCATGCAACGCTTTGAAGAC  
343 E V F N T F S Q K D D I D E L F R K V M Q R F E D  
1426 TTTTCTGTTCAAAACAAAAGACAGATGGCAACCAAAGACAGATGCACTTTGACAAAGCGCTTCCATTTCTTTCCA  
368 F S V Q N K R Q M A T K D R C T L T K R F H F F P  
1501 GGCCT**CTG**Agacaagactgagagttttttaaacacgggcttgtagccacatttcaaaaaatgcctgcaatattact  
393 G L \*  
1576 tgggtgaatacaccttatggatggattactaagatactcatgtcatttatatttttataaatgacagtgtgtaagg  
1651 ctttgaagtcatggcacacatagattttttattatcatcttttatataacagaatgctttcctatagatgtcatg  
1726 caacaagtccactgttttcttttggggagaaaaacagcatattgaatgattgcctgcaccaggtcctagtaatt  
1801 ccaccaaaatttcaaaacacacctgcctgcaaaacttatgtactgctttgattccctatatgacagggcaacatgca  
1876 aaatgtgtaatgtttactatctatttttagtaaaaattttcaacaatctatagaaattatatattggtattaattt  
1951 taaagtttaaaatttctcaccgttttaaaataagtgggtggtataggcatttgttatatagggactataatgtaaag  
2026 gtcatttgactatcccagatcttgatgtaattgatttgcattactaagcaaagtaagcataattaagcttataaa  
2101 aatgtattcacatttgtgatgtgacatattggcatttaatgggcatttagttttgtttgaattcattttgttttg  
2176 aactacaa**attaaa**actttttttgcaaaaaaaaaaaaaaaaaaaaaaaaaaaaaa

**Supplement Figure S3. cDNA and deduced amino acid sequence of *Lmcaspase1*.** The ORF is shown in upper case and the 5'-UTR and 3'-UTR sequences are in lower case. The translation initiation codon, stop codon and polyadenylation signal are shown in bold.
